# Supplementary material for: Magnetic field driving gradient effects on the microstructure in amorphous–nanocrystalline cobalt alloy ribbons
Source: Royal Society of Chemistry journal article supplement (doi:10.1039/c1nr10968e), 2011-11-17

## Supporting Information

**Figure S1** The secondary electron SEM image for the cross-section of the ribbon annealed under the transverse field

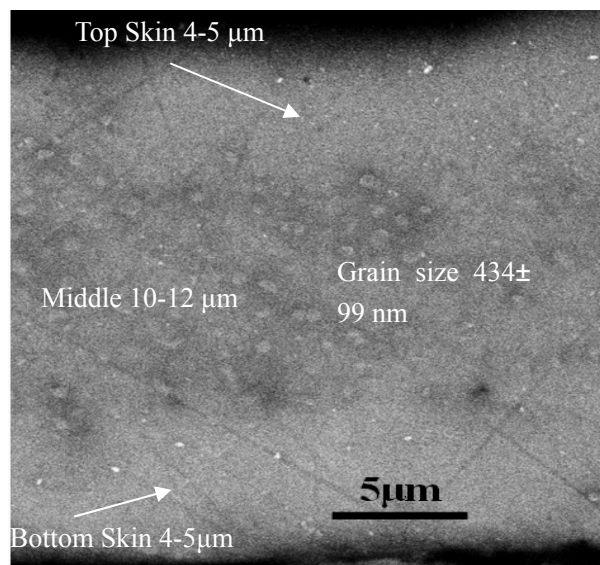

Supplement: c1nr10968e.pdf [file c1nr10968e.pdf]
